# Supplementary material
Source: MDPI journal article supplement (https://www.mdpi.com/2304-6740/11/1/34)
Supplement: s1 [file s1]

## Supporting Information

### Design and synthesis of new boron-based benzo[c][1,2,5]oxadiazoles and benzo[c][1,2,5]thiadiazoles as Hypoxia inhibitors

Sasmita Das <sup>1,\*</sup>, Mohammed Adil Shareef <sup>1</sup> and Bhaskar C. Das <sup>1,2,\*</sup>

<sup>1</sup> Arnold and Marie Schwartz College of Pharmacy and Health Sciences, Long Island University, Brooklyn, NY 11201, USA

<sup>2</sup> Department of Medicine and Pharmacological Sciences, Icahn School of Medicine at Mount Sinai, New York, NY 10029, USA

\* Correspondence: sasmita.das@liu.edu (S.D.); bhaskar.das@liu.edu (B.C.D.)

#### Table of contents

|                              |      |
|------------------------------|------|
| 1. Spectral Data of Products | 7-23 |
|------------------------------|------|

|      |
|------|
| 2-29 |
|------|

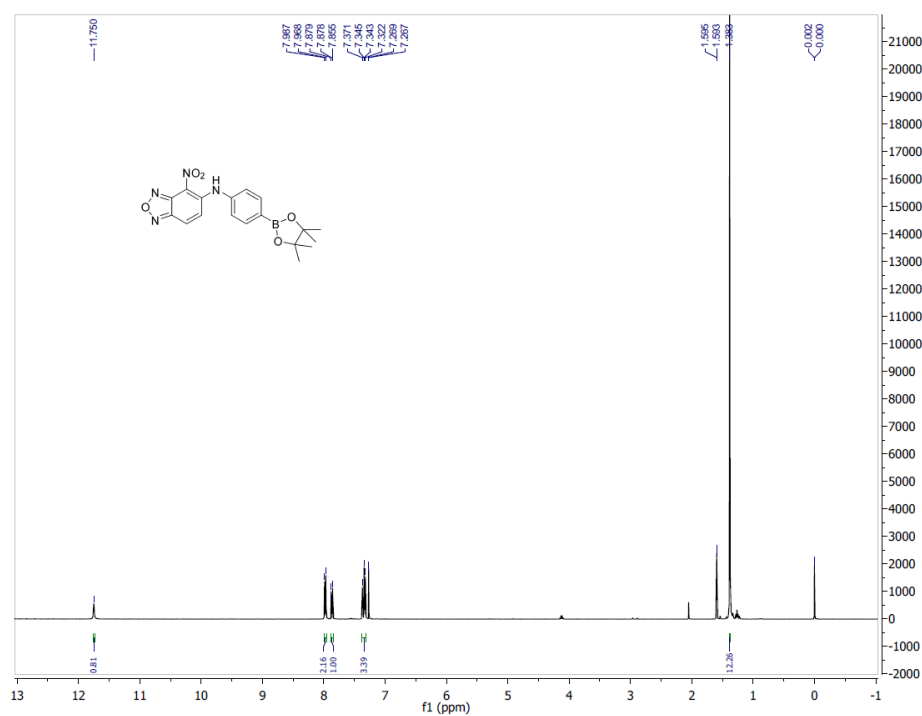

**<sup>1</sup>H NMR of compound (7)**

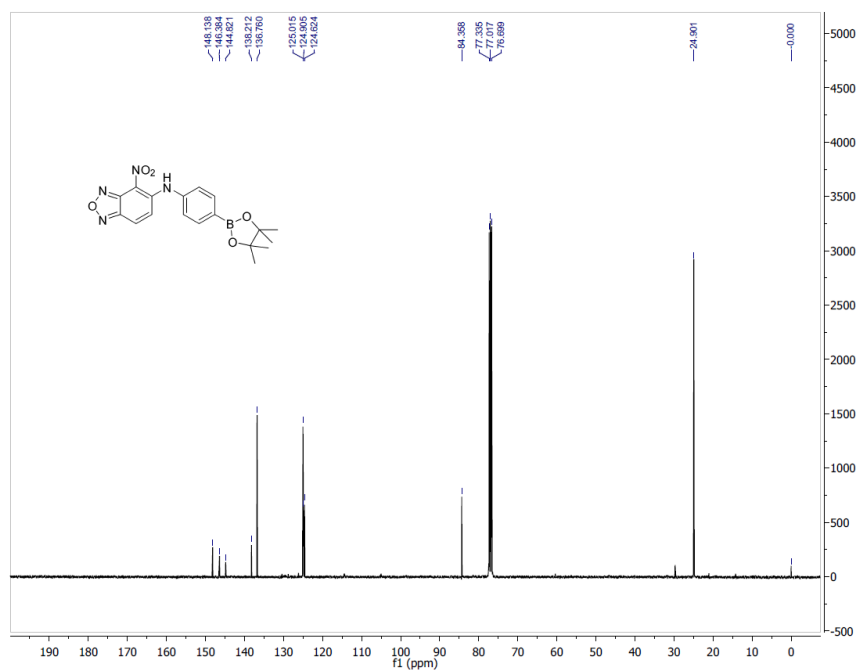

**<sup>13</sup>C NMR of compound (7)**

Spectrum View - MAS-H-7C.d

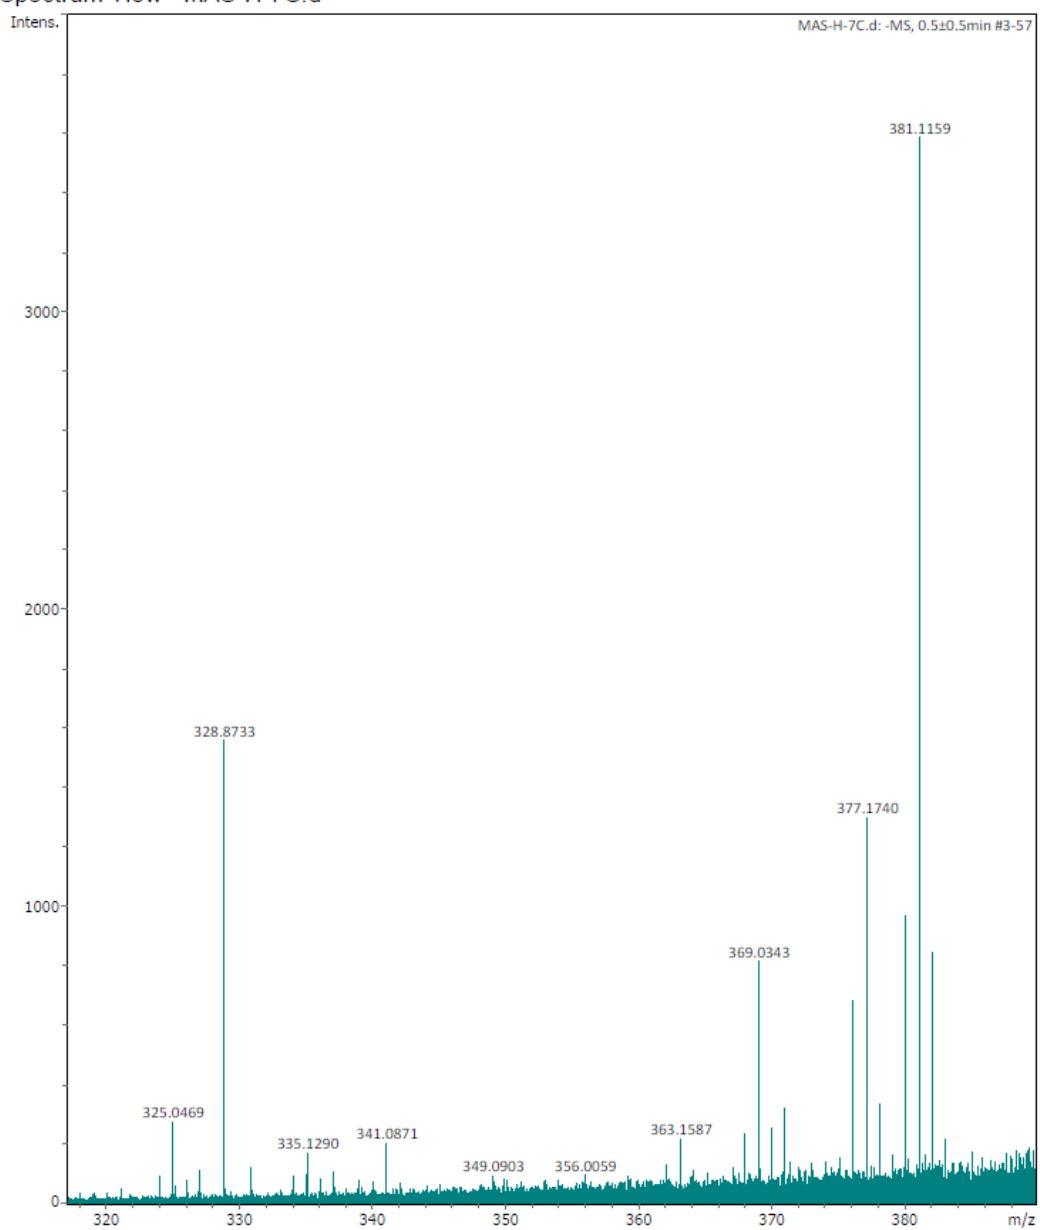

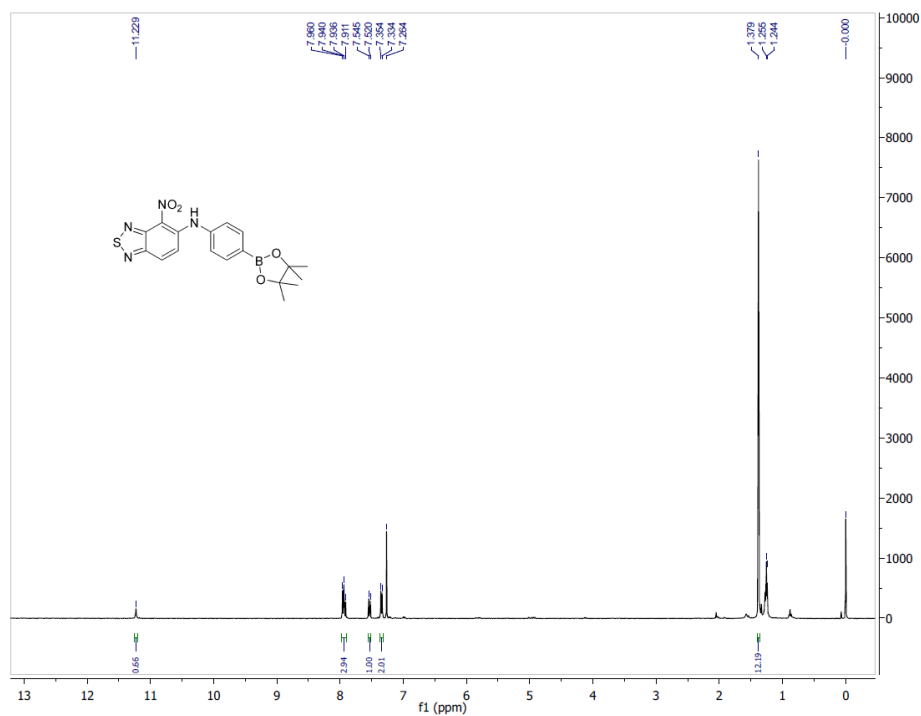

**<sup>1</sup>H NMR of compound (8)**

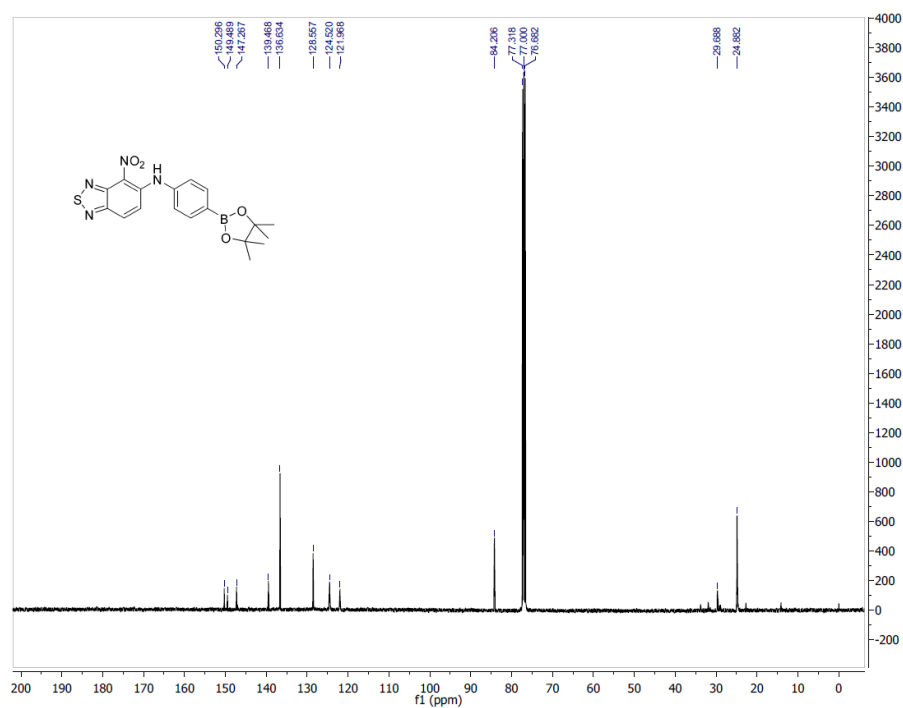

**<sup>13</sup>C NMR of compound (8)**

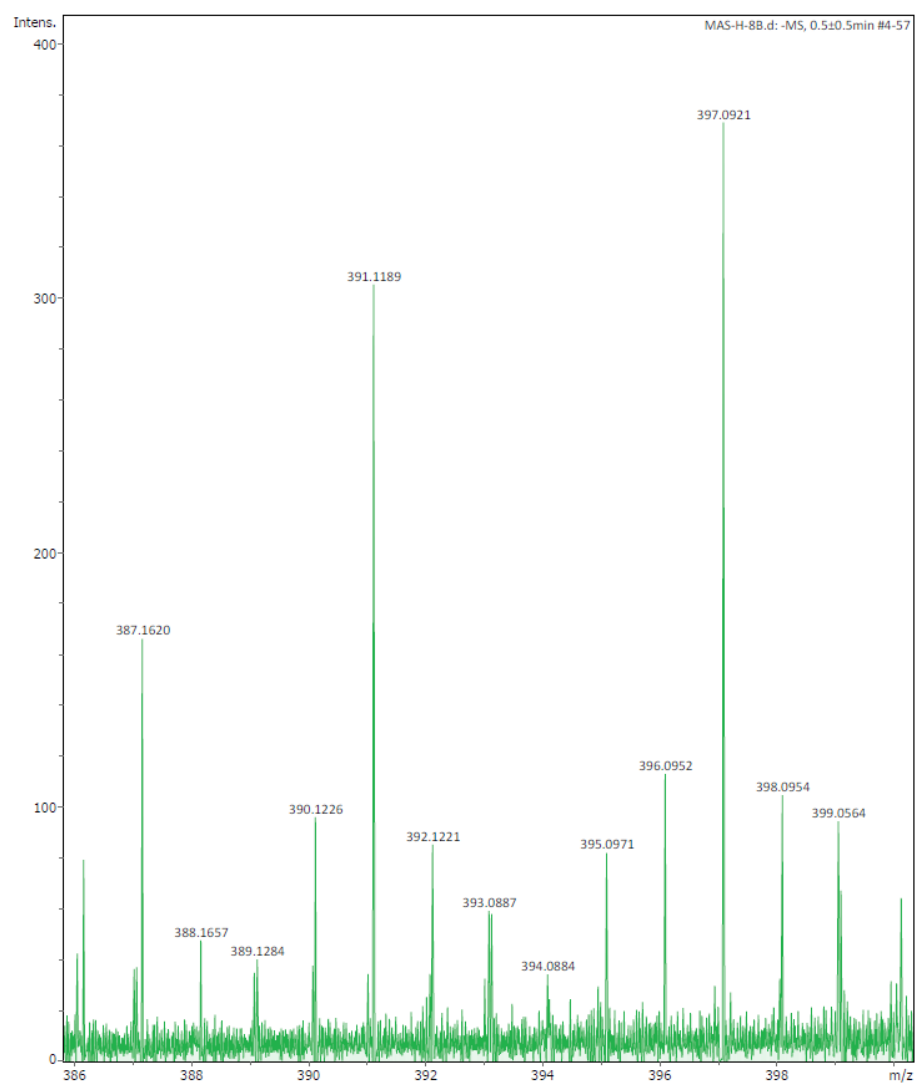

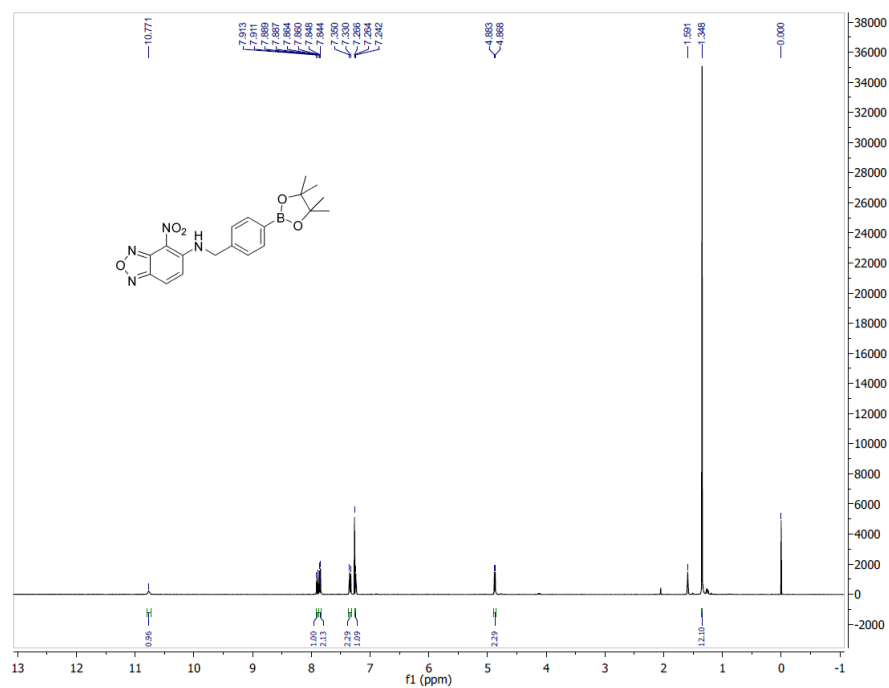

**<sup>1</sup>H NMR of compound (9)**

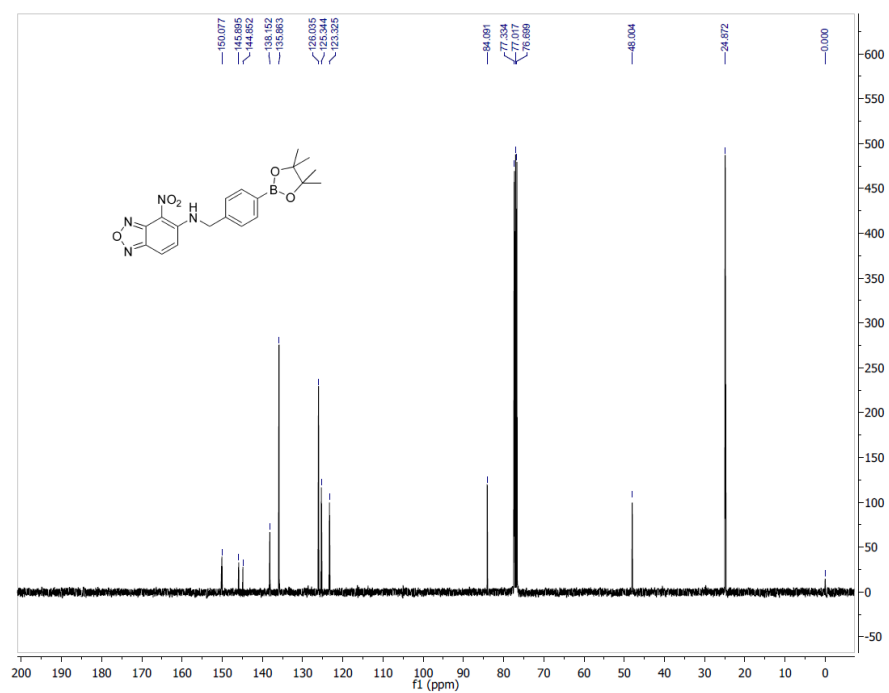

**<sup>13</sup>C NMR of compound (9)**

Spectrum View - MAS-H-9.d

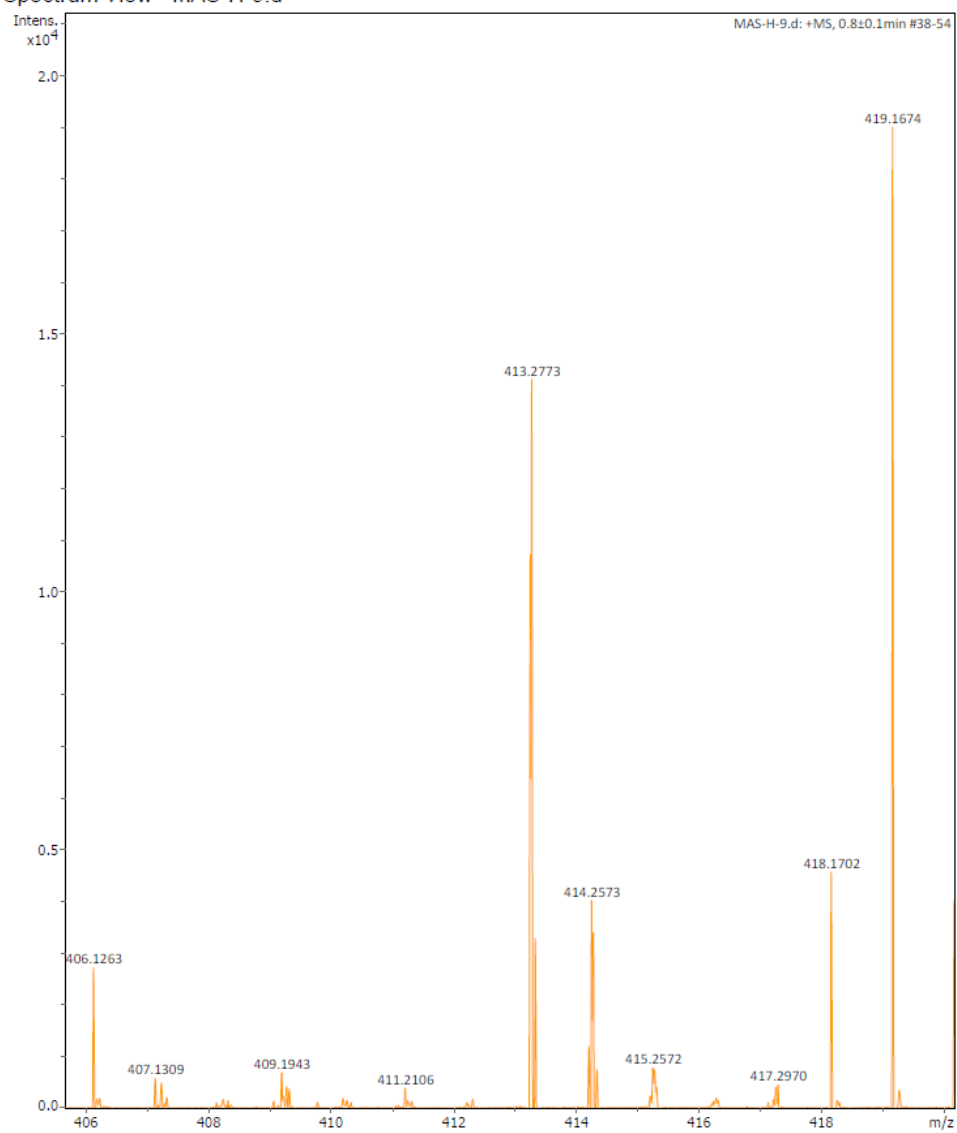

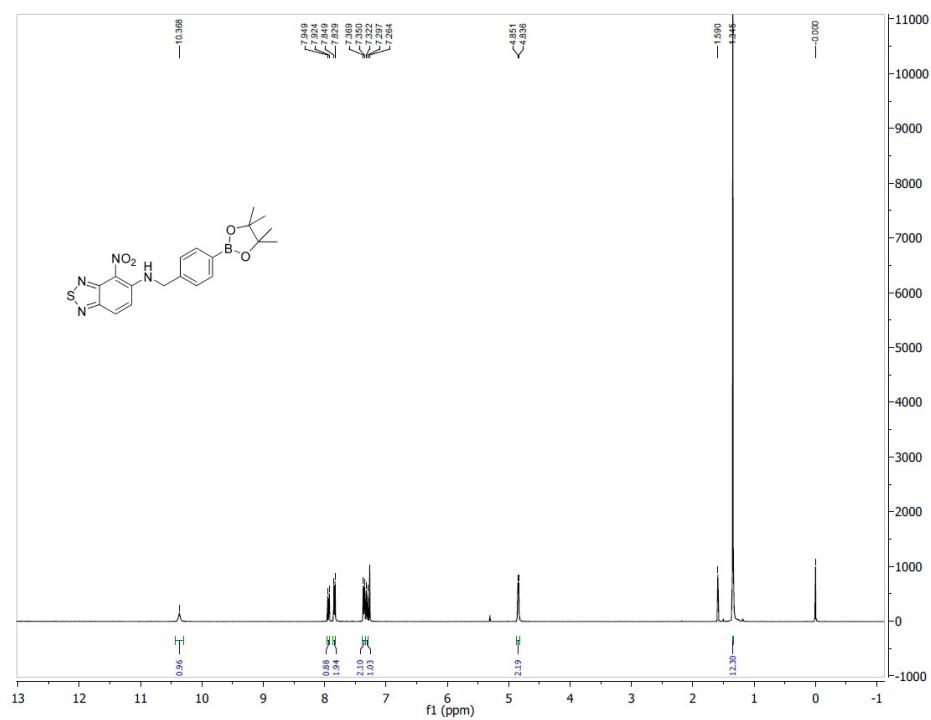

**<sup>1</sup>H NMR of compound (10)**

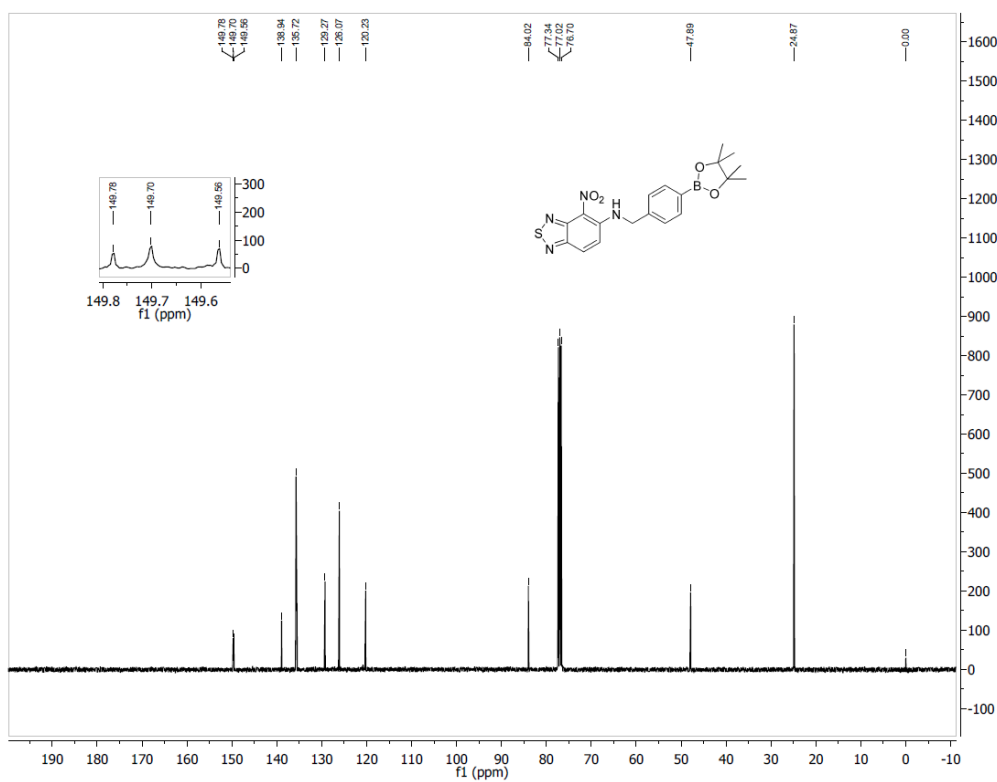



# <sup>13</sup>C NMR of compound (10)

Compound Spectra - MAS-H-10.d

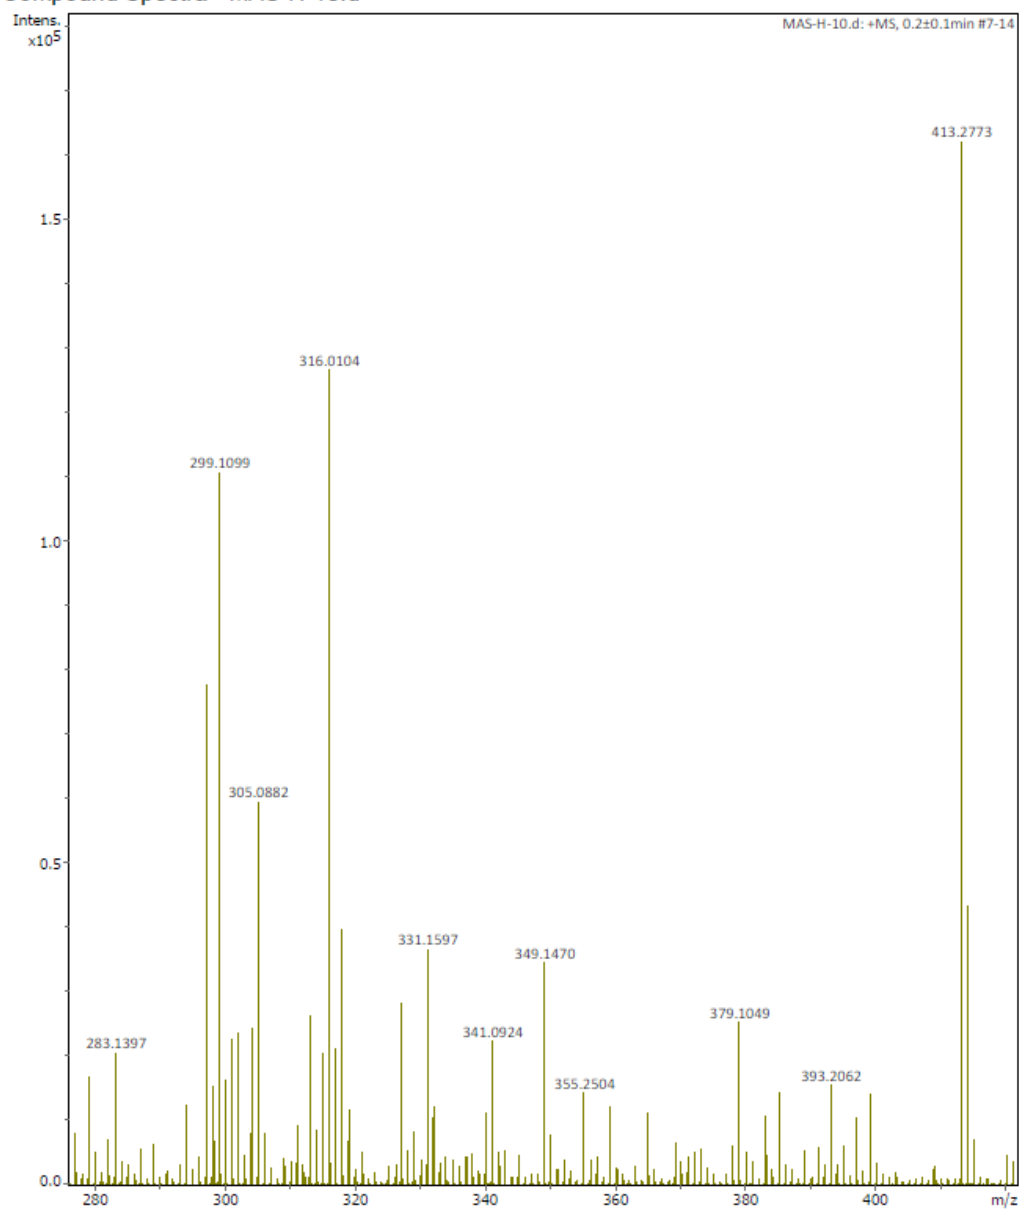

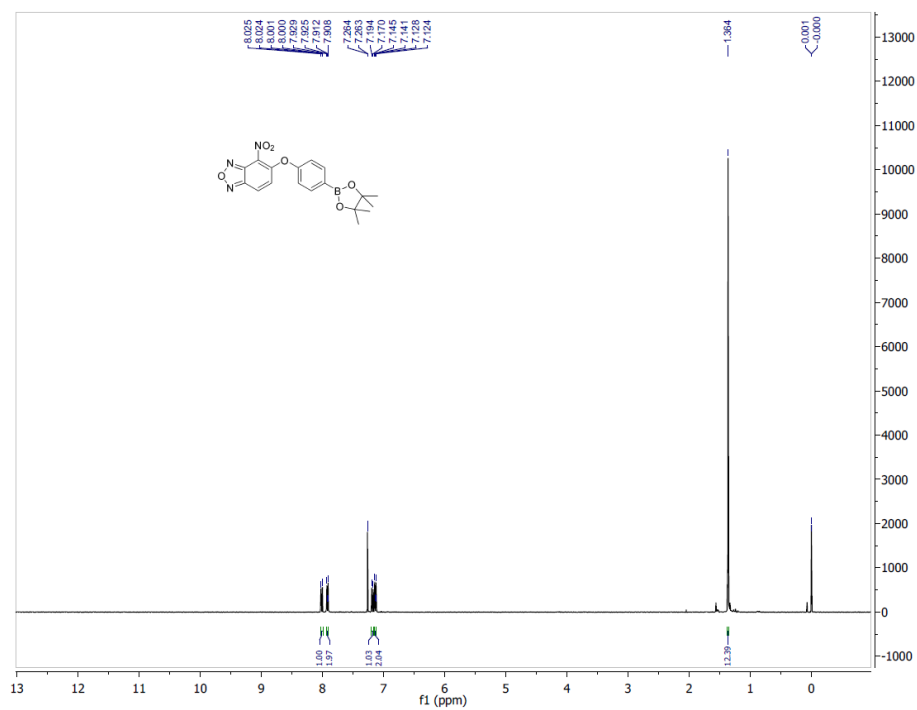

**<sup>1</sup>H NMR of compound (11)**

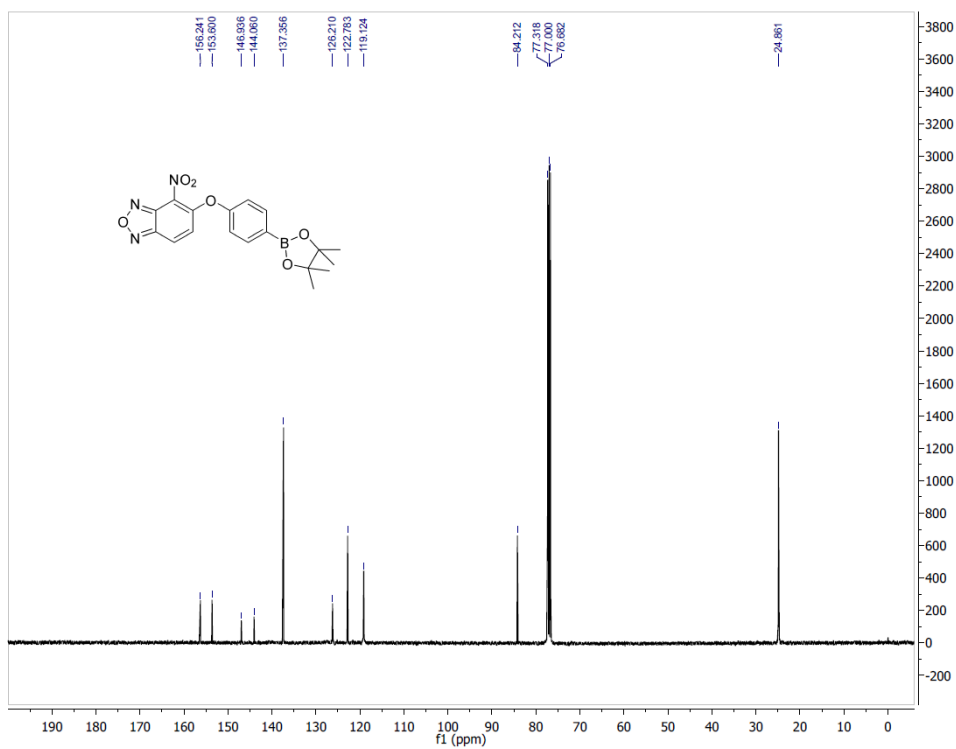

# <sup>13</sup>C NMR of compound (11)

Spectrum View - MAS-H-11B.d

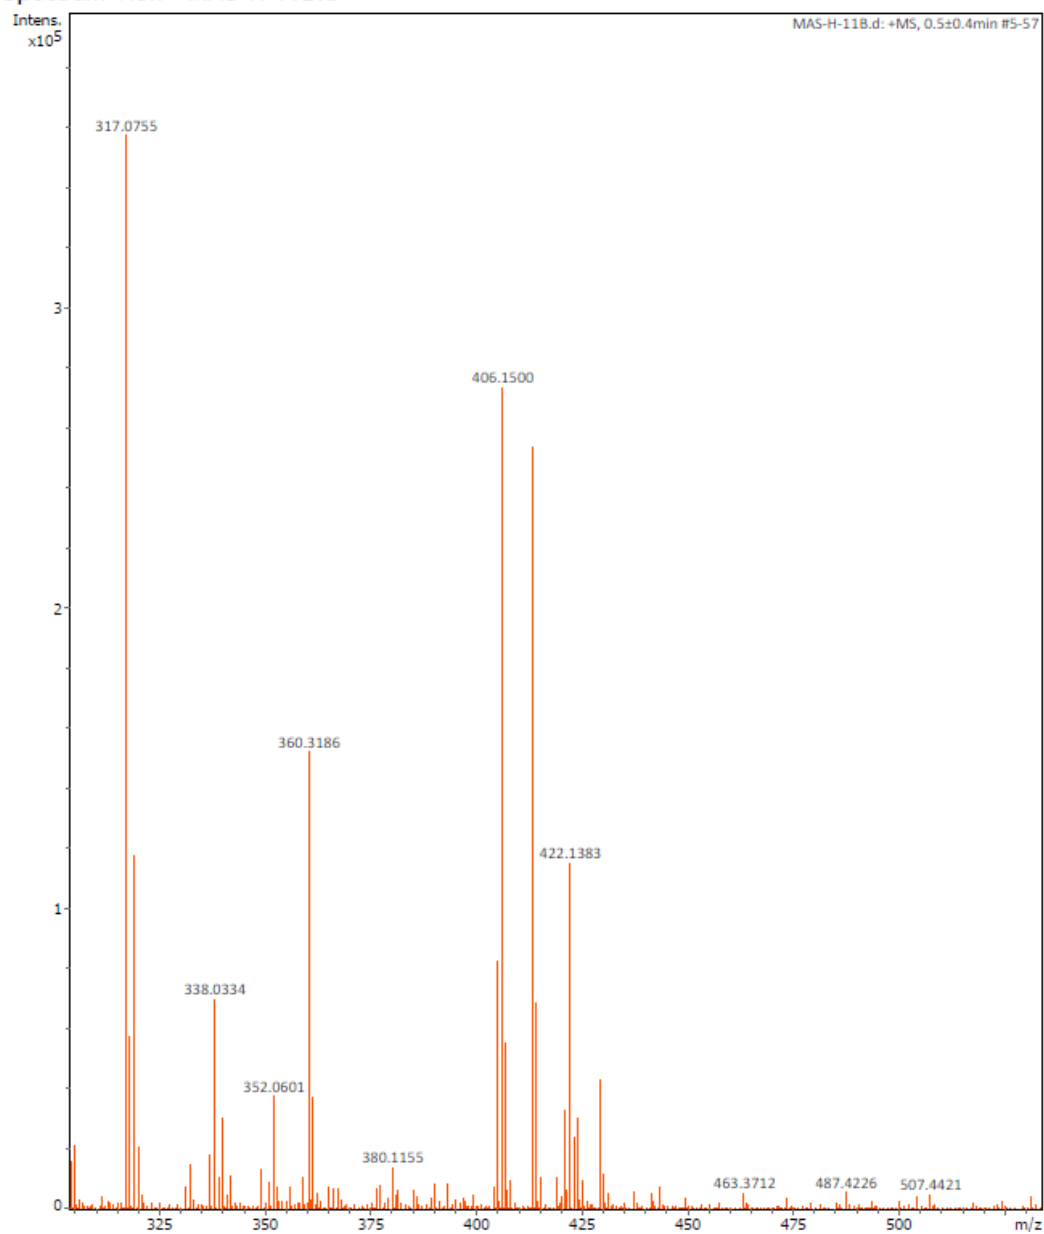

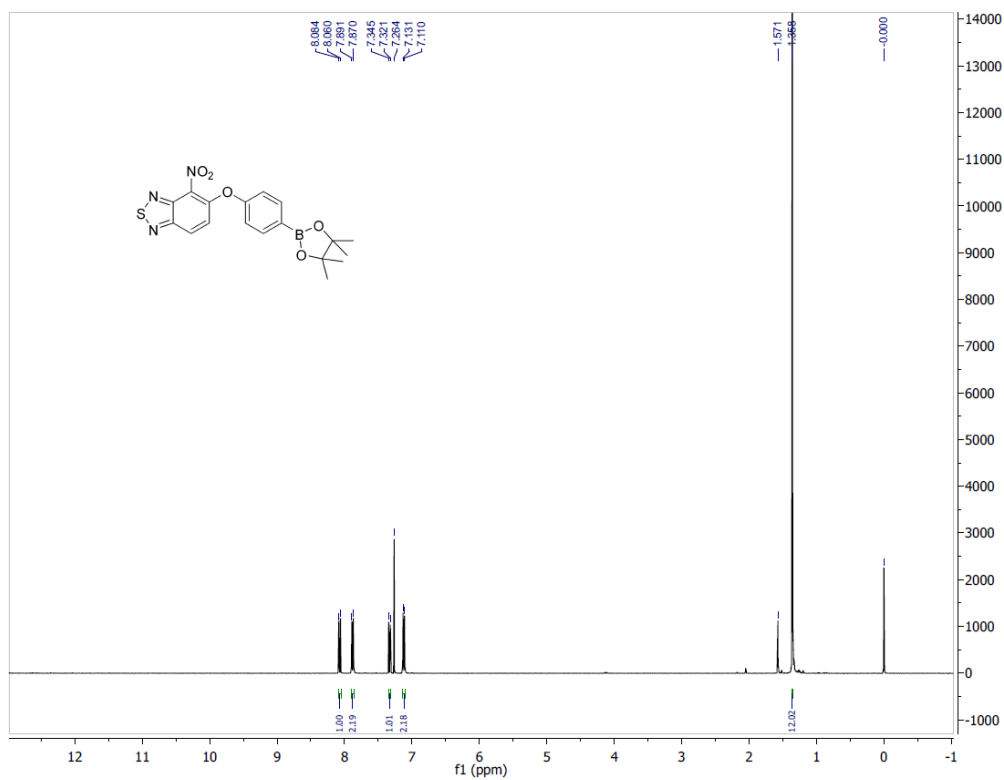

**<sup>1</sup>H NMR of compound (12)**

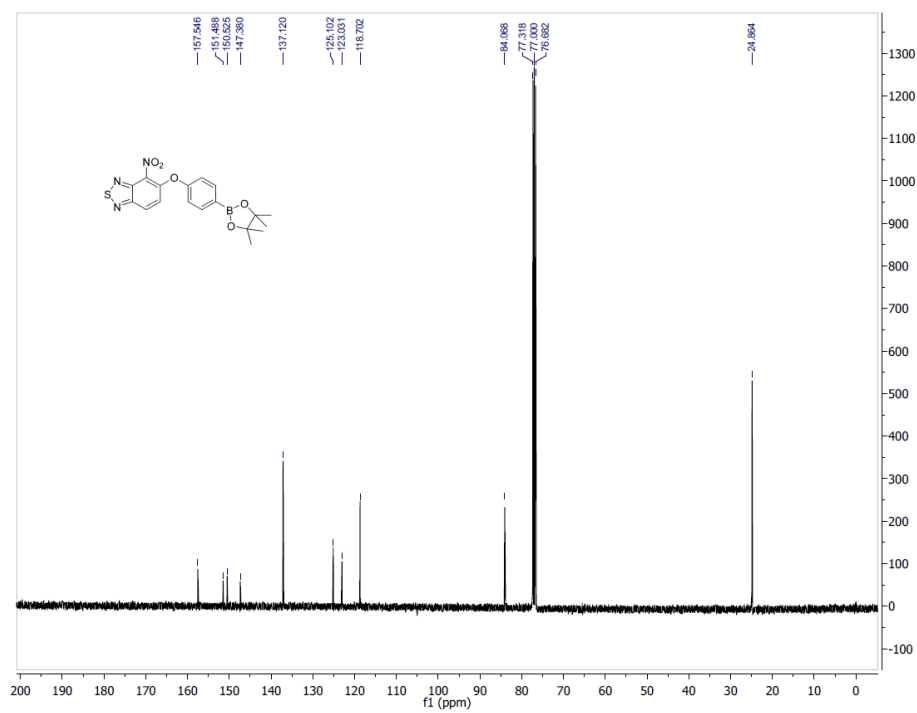

**<sup>13</sup>C NMR of compound (12)**

Spectrum View - MAS-H-12NEWD.d

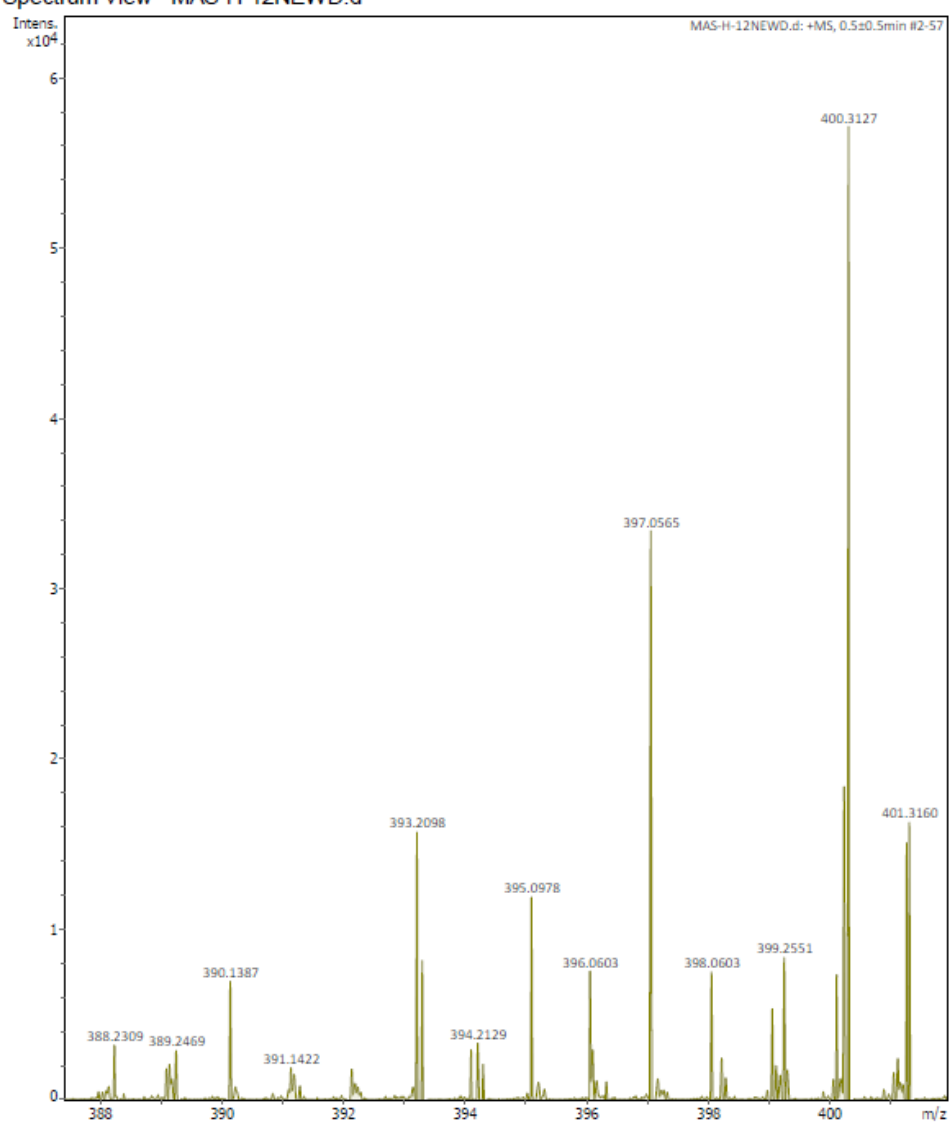

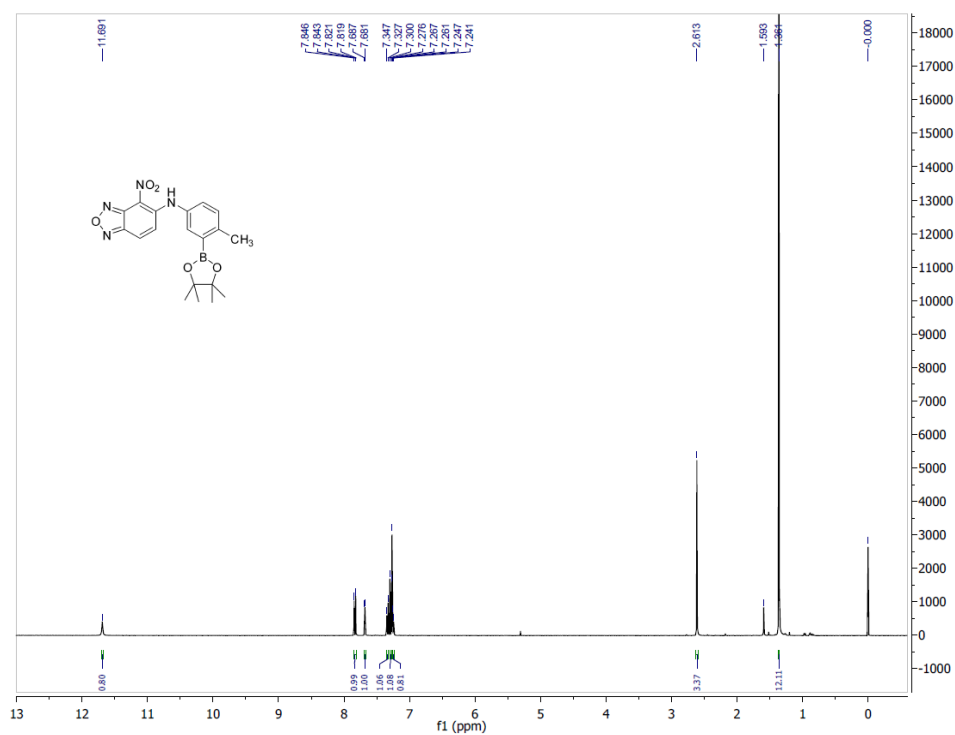

<sup>1</sup>H NMR of compound (13)

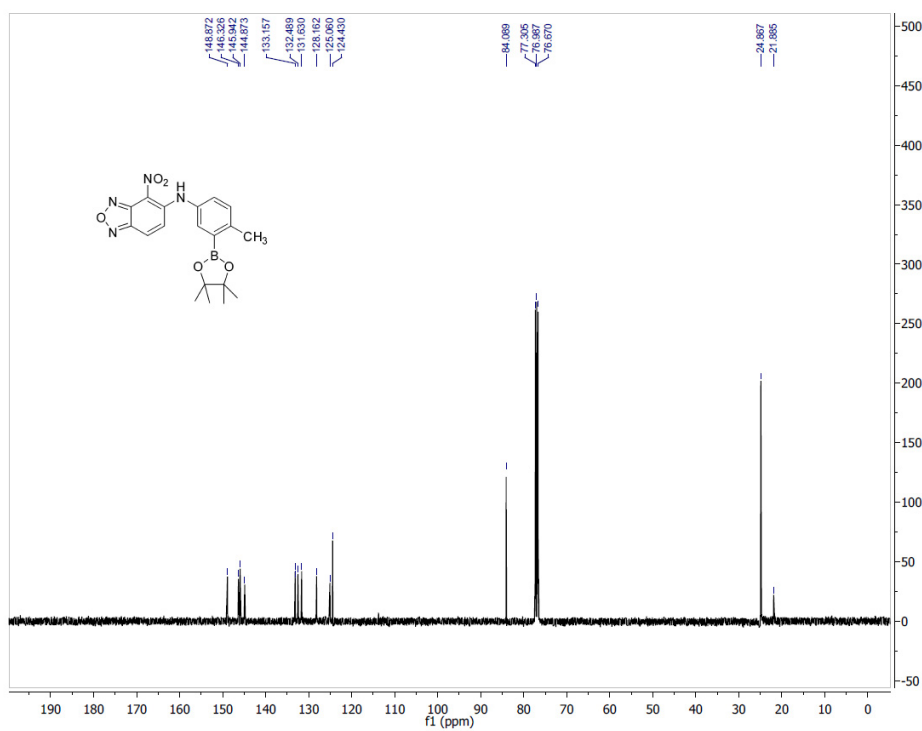

<sup>13</sup>C NMR of compound (13)

Spectrum View - MAS-H-13A.d

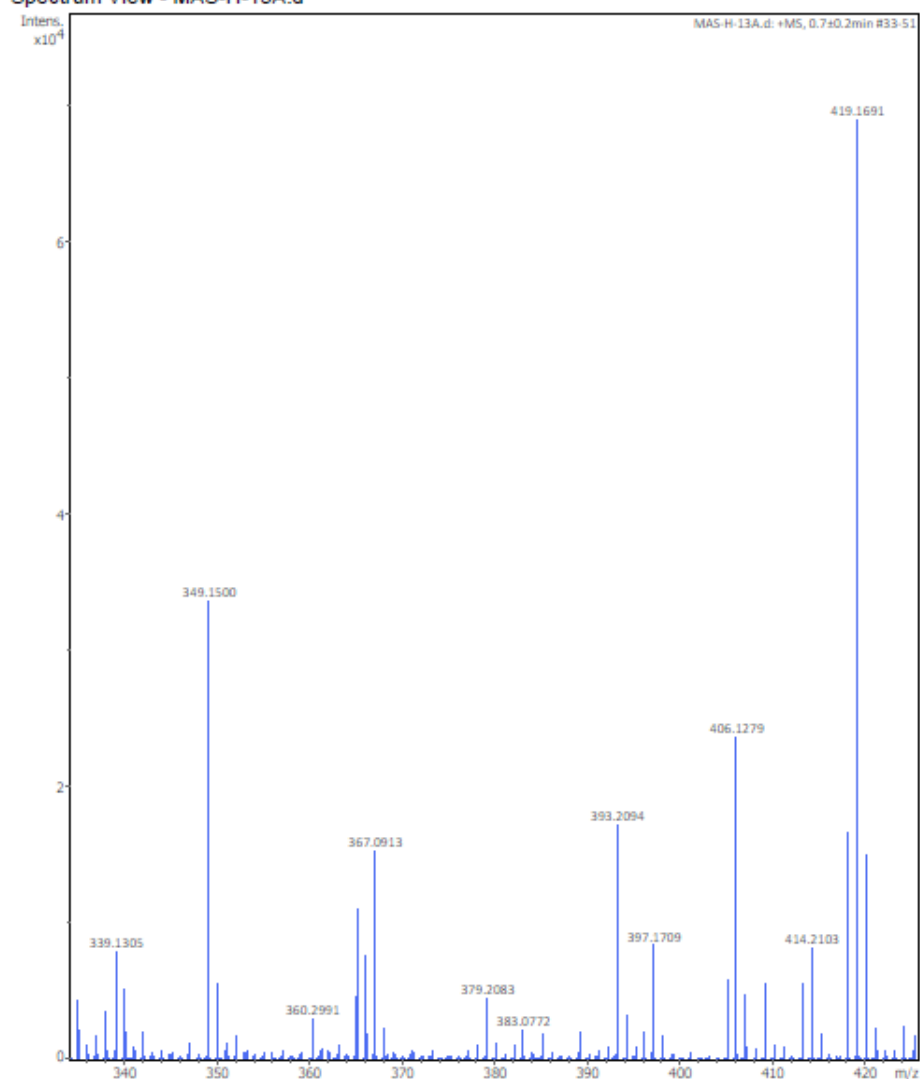

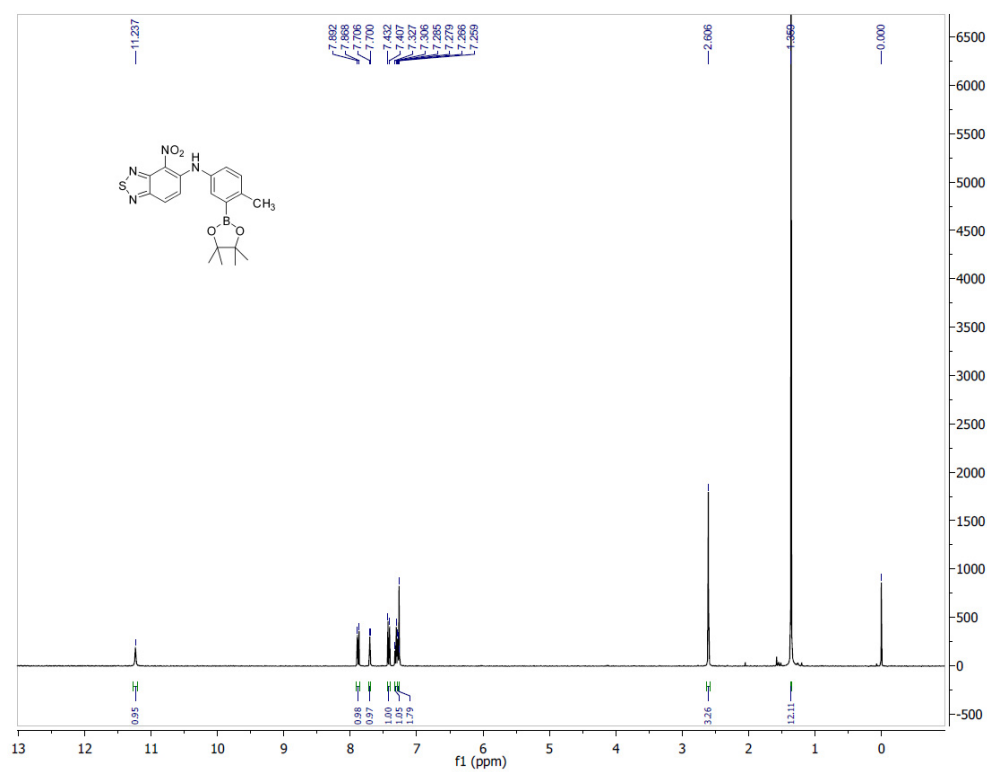

**<sup>1</sup>H NMR of compound (14)**

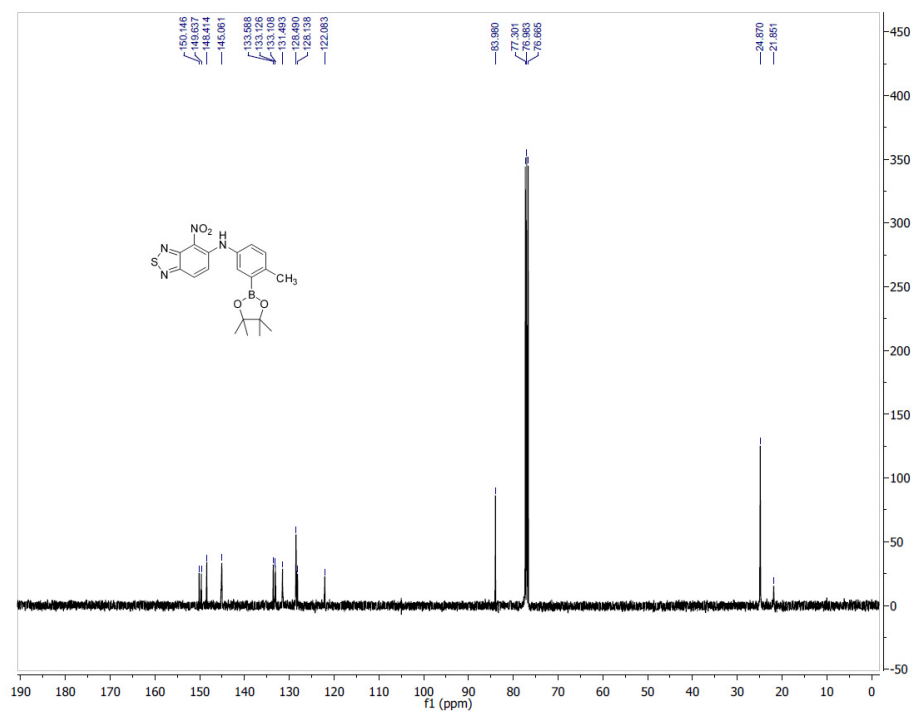



# <sup>13</sup>C NMR of compound (14)

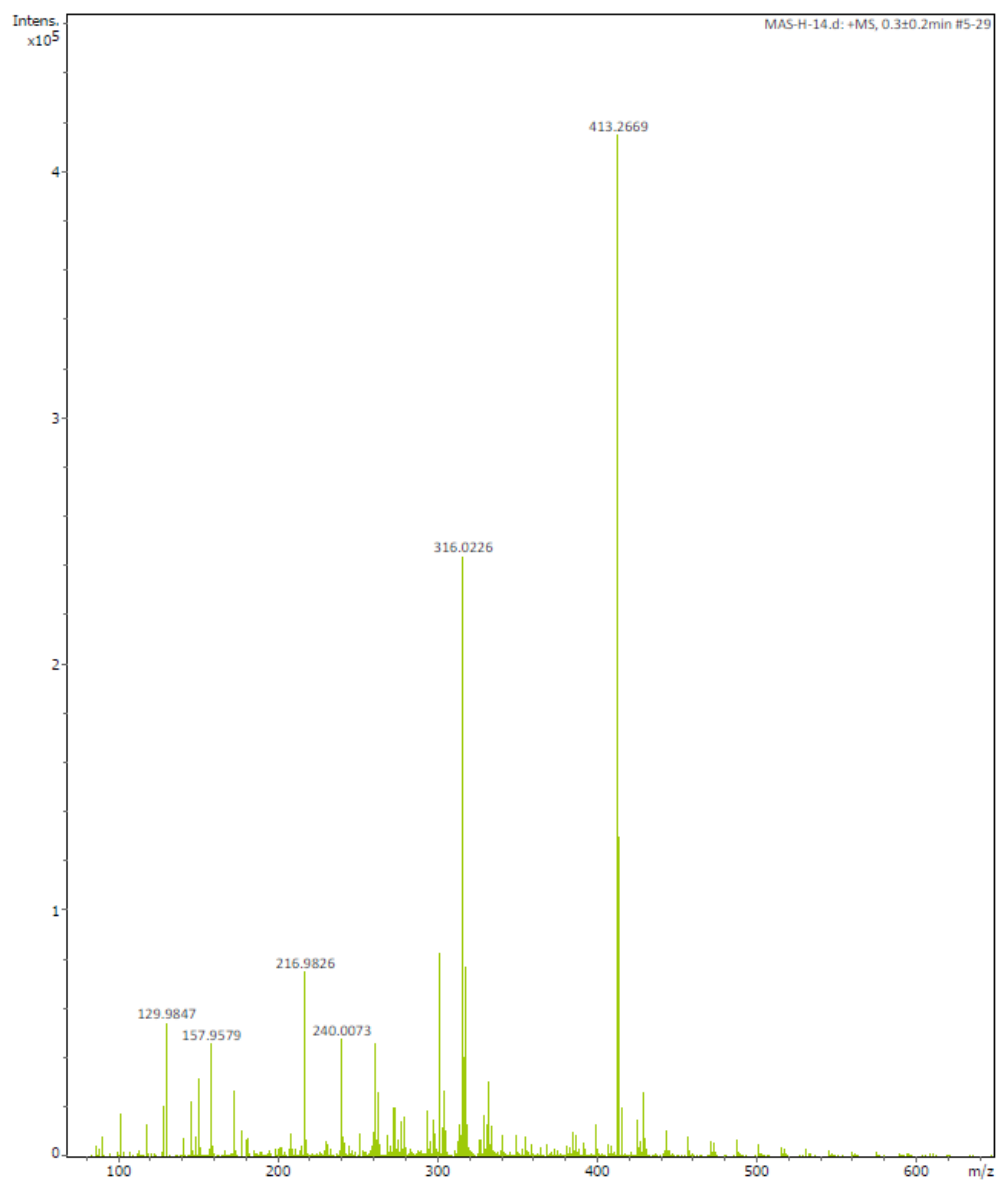

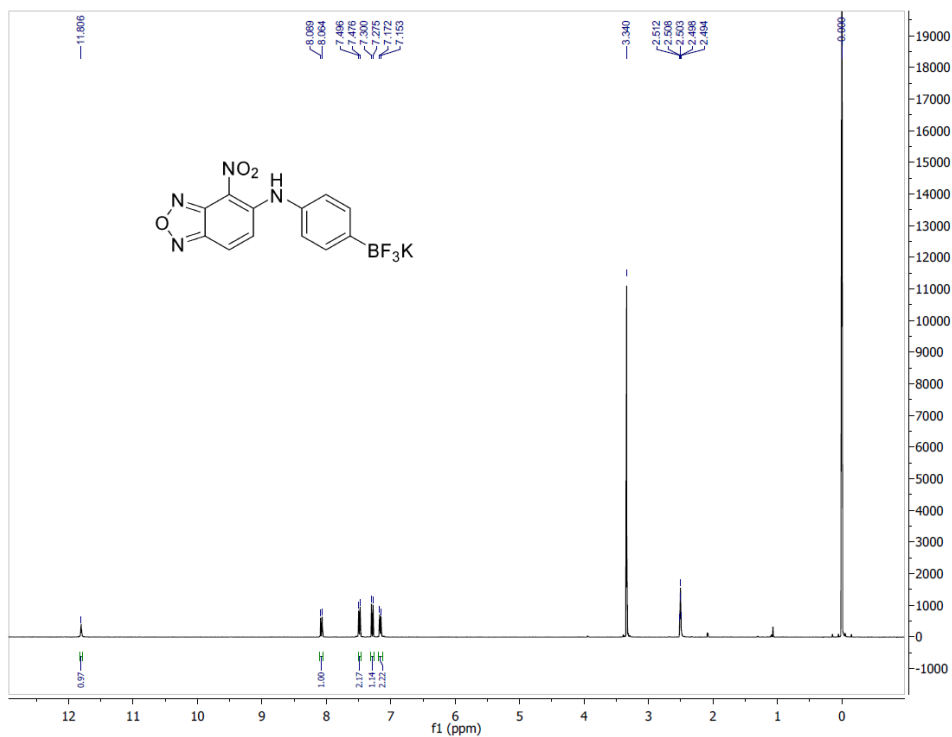

**<sup>1</sup>H NMR of compound (15)**

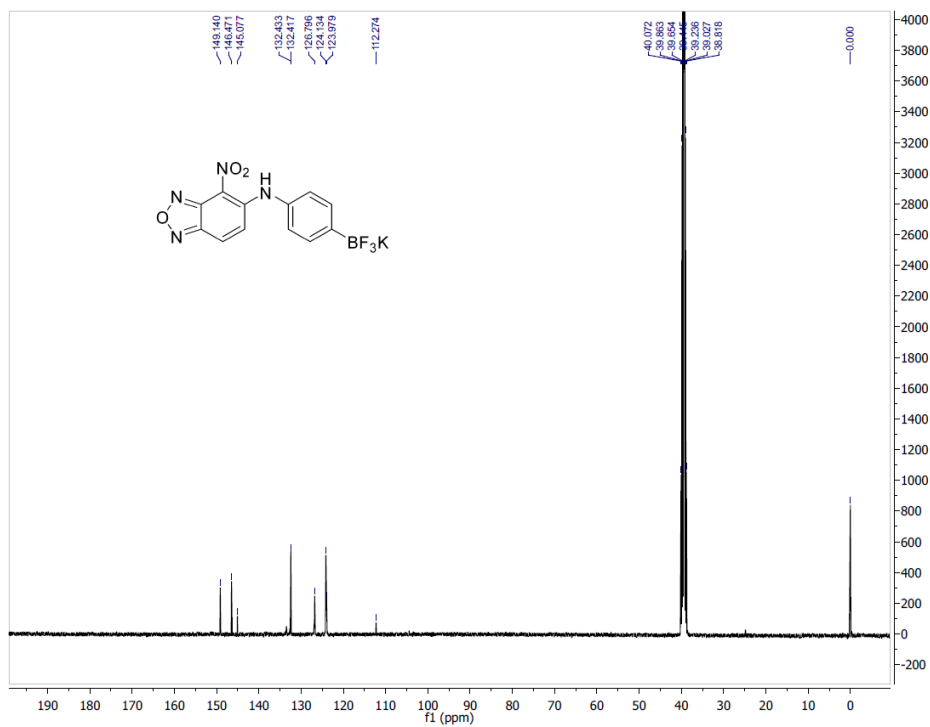

**<sup>13</sup>C NMR of compound (15)**

COMP-15

—139.41

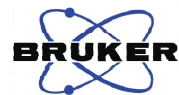

Current Data Parameters  
 NAME Oct14-2022-Das  
 EXPNO 4  
 PROCNO 1

F2 - Acquisition Parameters  
 Date\_ 20221014  
 Time 17.01 h  
 INSTRUM Avance Neo 400 Nanobay  
 PROBHD Z163739\_0311 ( )  
 PULPROG zg  
 TD 131072  
 SOLVENT DMSO  
 NS 64  
 DS 4  
 SWH 90909.094 Hz  
 FIDRES 1.387163 Hz  
 AQ 0.7208960 sec  
 RG 101  
 DW 5.500 usec  
 DE 6.50 usec  
 TE 295.8 K  
 D1 1.00000000 sec  
 TD0 1  
 SFO1 376.4748291 MHz  
 NUC1 19F  
 P1 12.00 usec  
 PLW1 30.18459947 W

F2 - Processing parameters  
 S1 65536  
 SF 376.5124803 MHz  
 WDW EM  
 SSB 0  
 LB 0.30 Hz  
 GB 0  
 PC 1.00

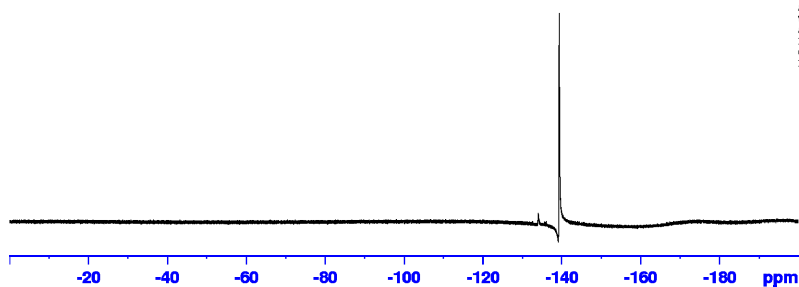

<sup>19</sup>F NMR of compound (15)

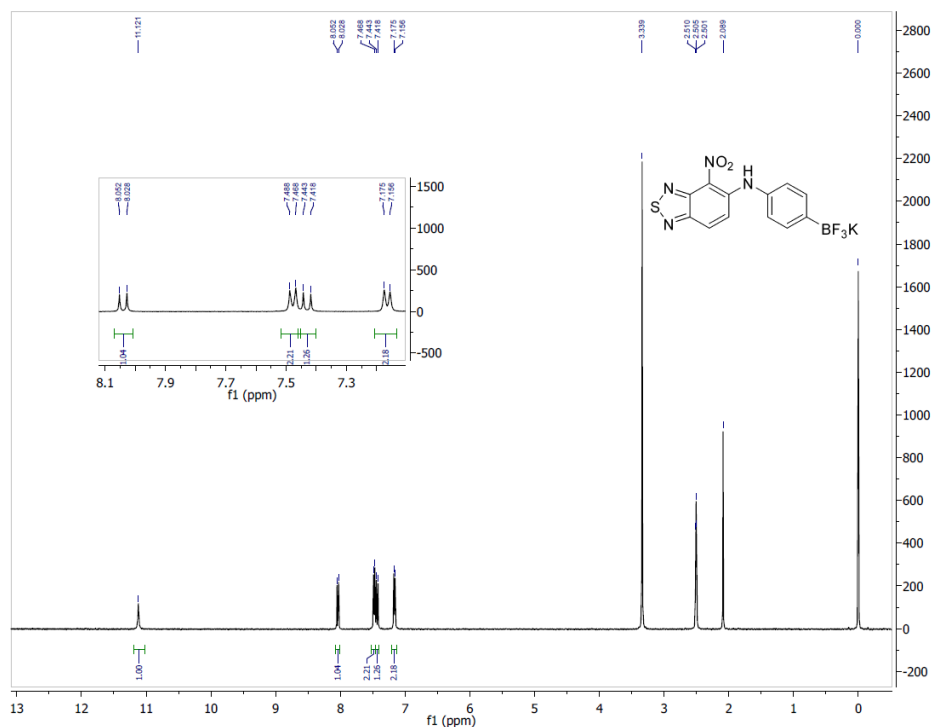

<sup>1</sup>H NMR of compound (16)

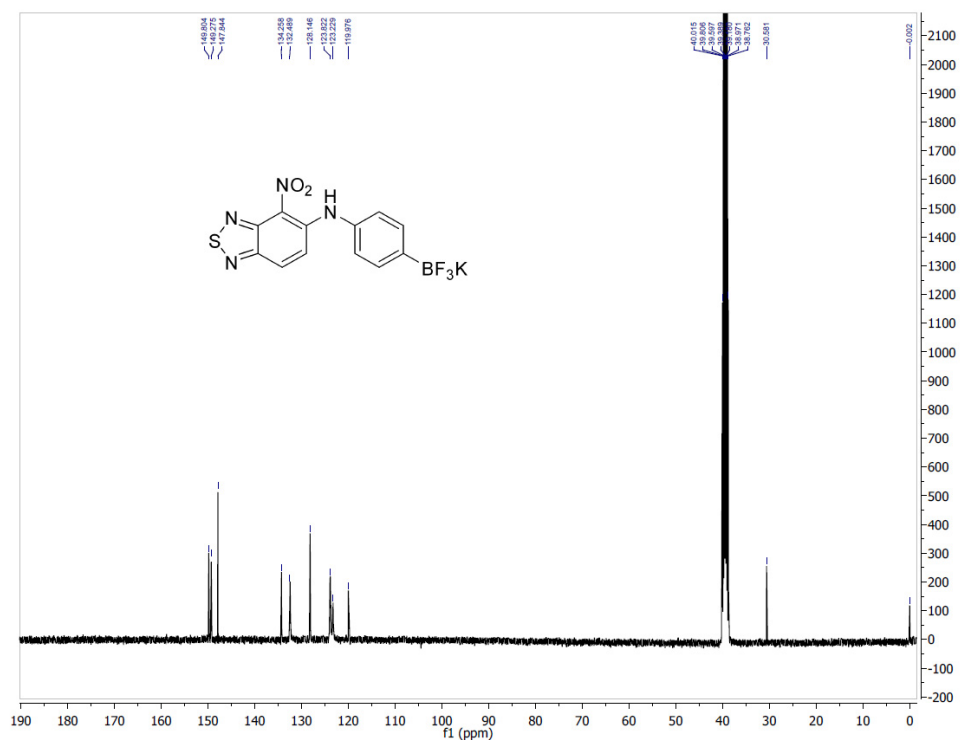

<sup>13</sup>C NMR of compound (16)

COMP-16

— -139.22

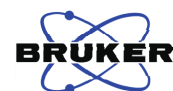

Current Data Parameters  
NAME Oct14-2022-Das  
EXPNO 5  
PROCNO 1

F2 - Acquisition Parameters  
Date\_ 20221014  
Time 17.16 h  
INSTRUM Avance Neo 400 Nanobay  
PROBHD 2163739\_0311 (   
PULPROG zgpg30  
TD 131072  
SOLVENT DMSO  
NS 64  
DS 4  
SWH 90909.094 Hz  
FIDRES 1.387163 Hz  
AQ 0.7208960 sec  
RG 101  
DW 5.500 usec  
DE 6.50 usec  
TE 295.2 K  
D1 1.00000000 sec  
TD0 1  
SFO1 376.4748291 MHz  
NUC1 19F  
P1 12.00 usec  
PLW1 30.18499947 W

F2 - Processing parameters  
SI 65536  
SF 376.5124803 MHz  
WDW EM  
SSB 0  
LB 0.30 Hz  
GB 0  
PC 1.00

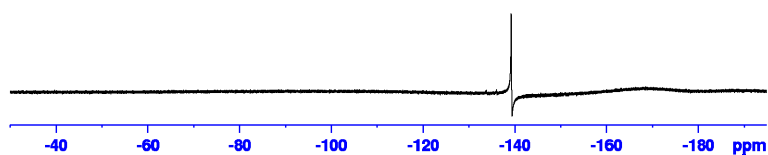

<sup>19</sup>F NMR of compound (16)

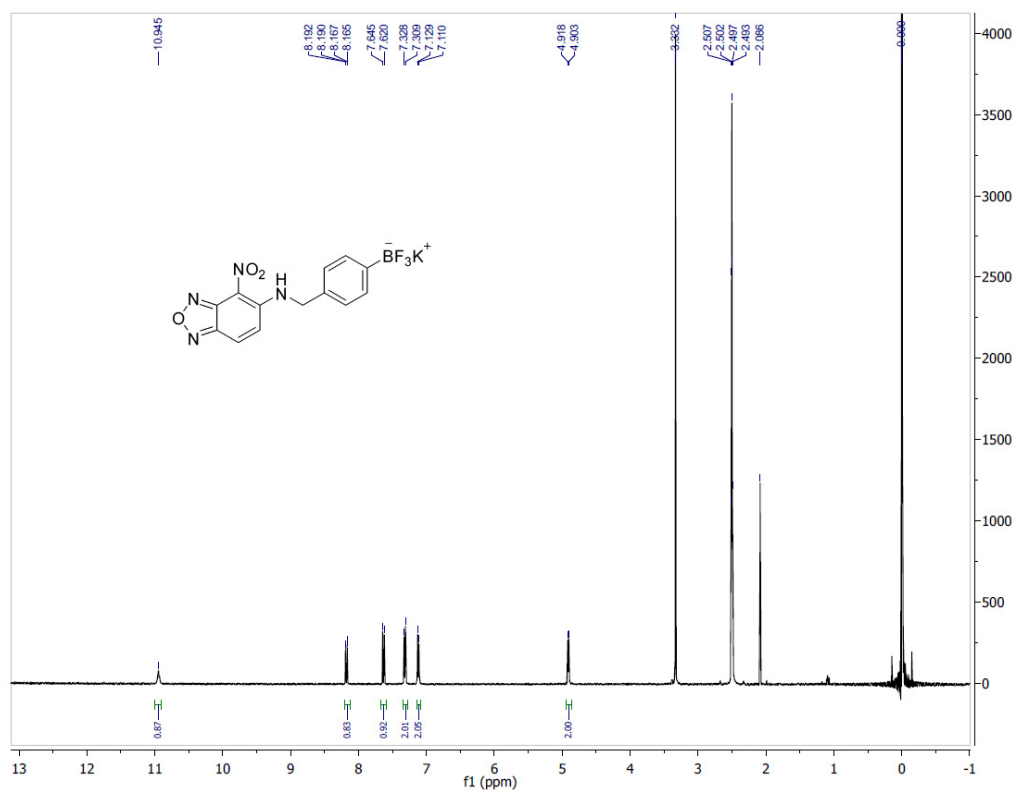

**<sup>1</sup>H NMR of compound (17)**

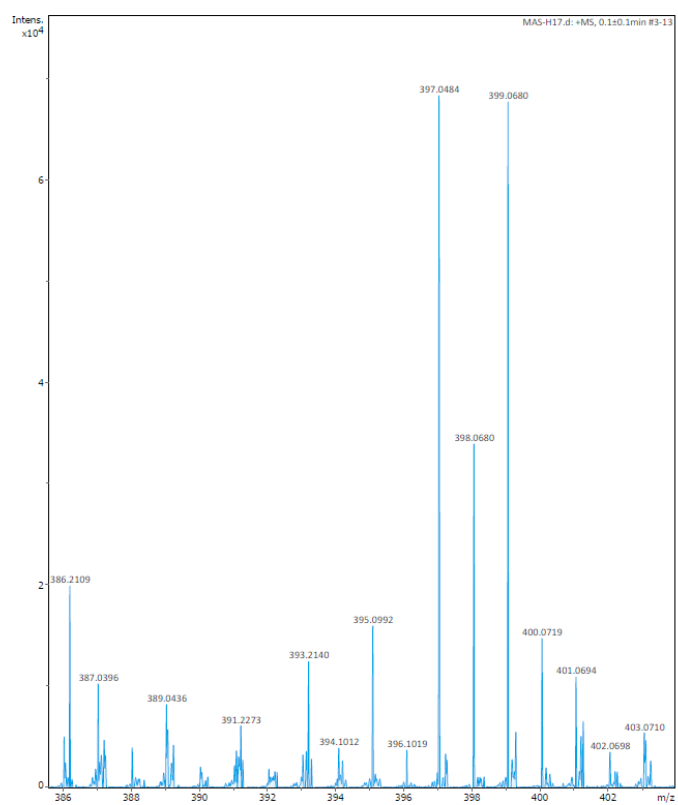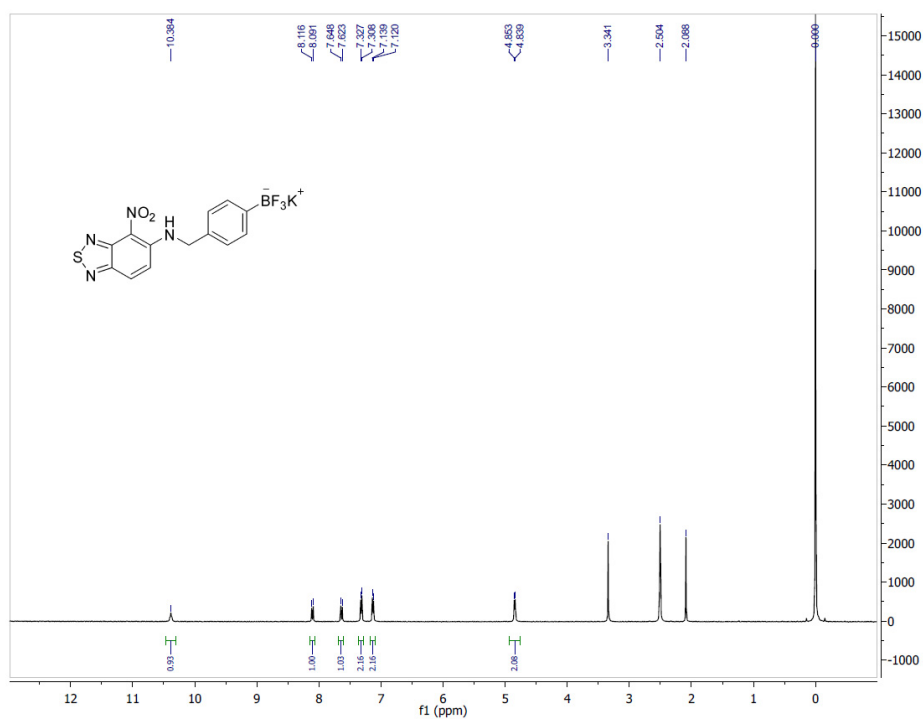

$^1\text{H}$  NMR of compound (18)

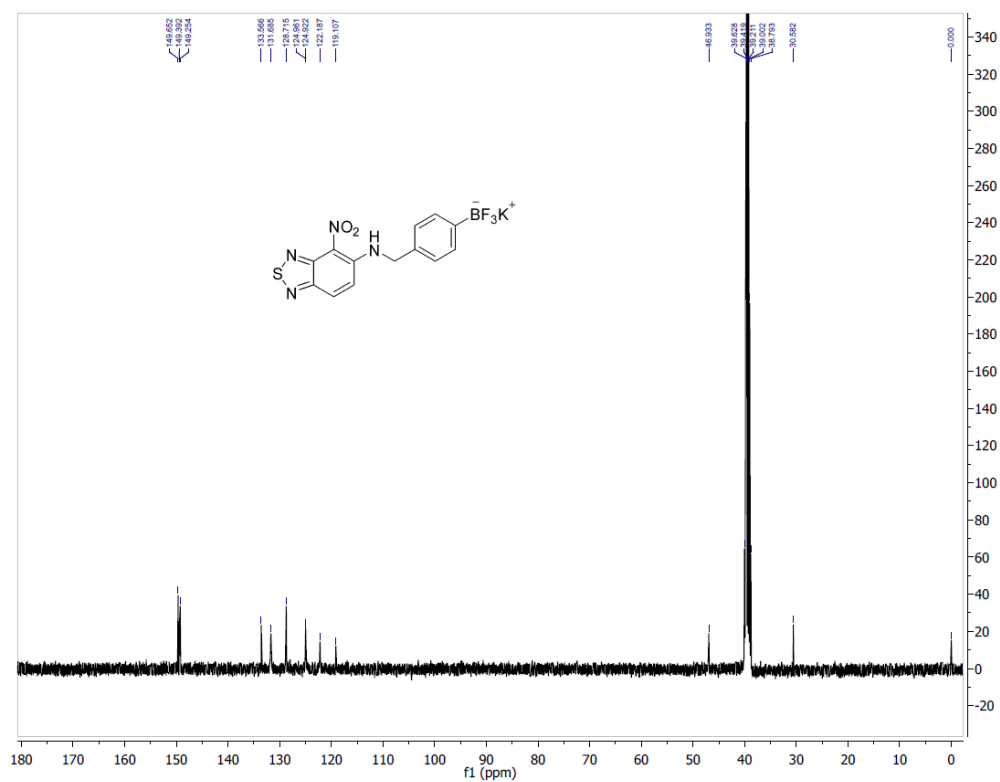

<sup>13</sup>C NMR of compound (18)

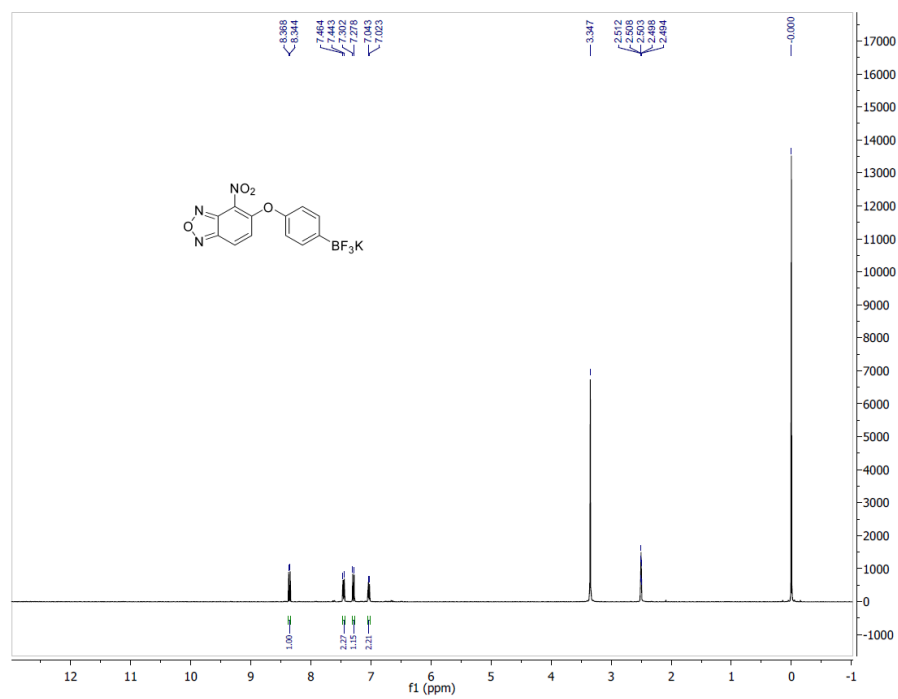

<sup>1</sup>H NMR of compound (19)

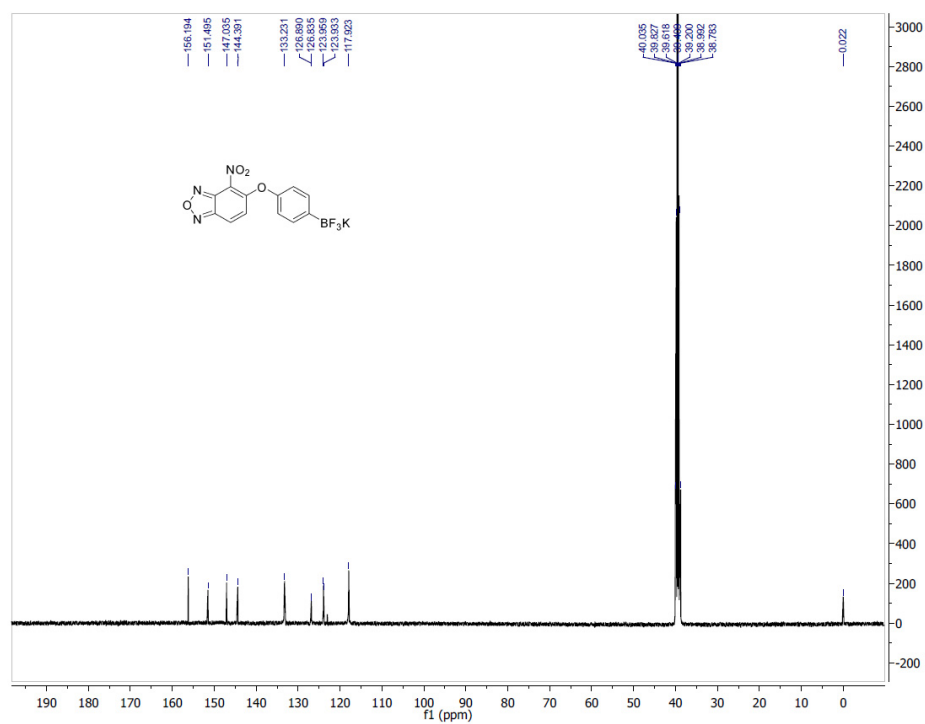

**<sup>13</sup>C NMR of compound (19)**

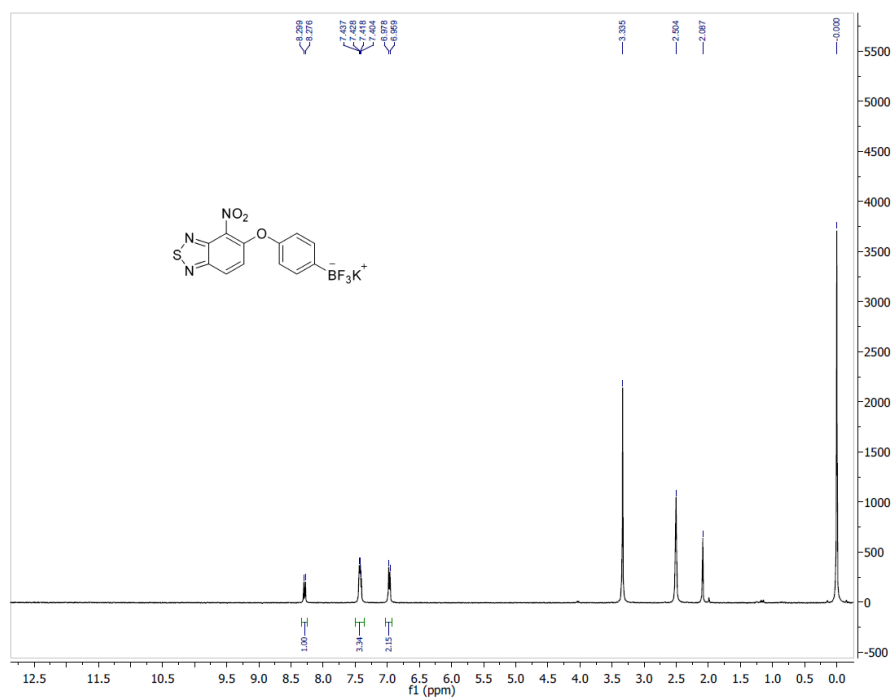

**<sup>1</sup>H NMR of compound (20)**



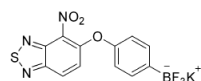

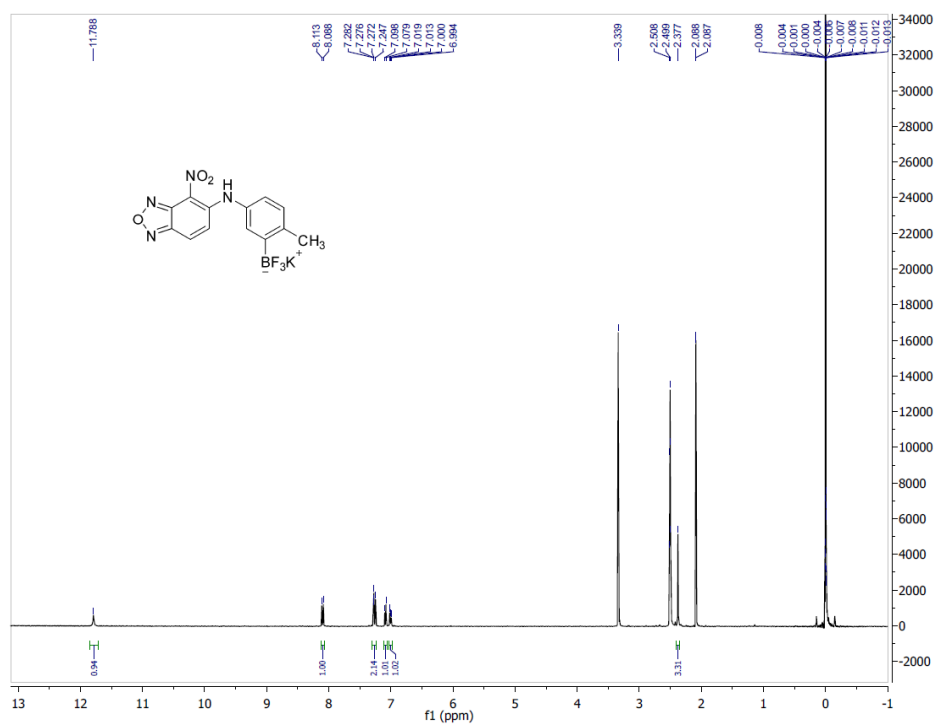

**<sup>1</sup>H NMR of compound (21)**

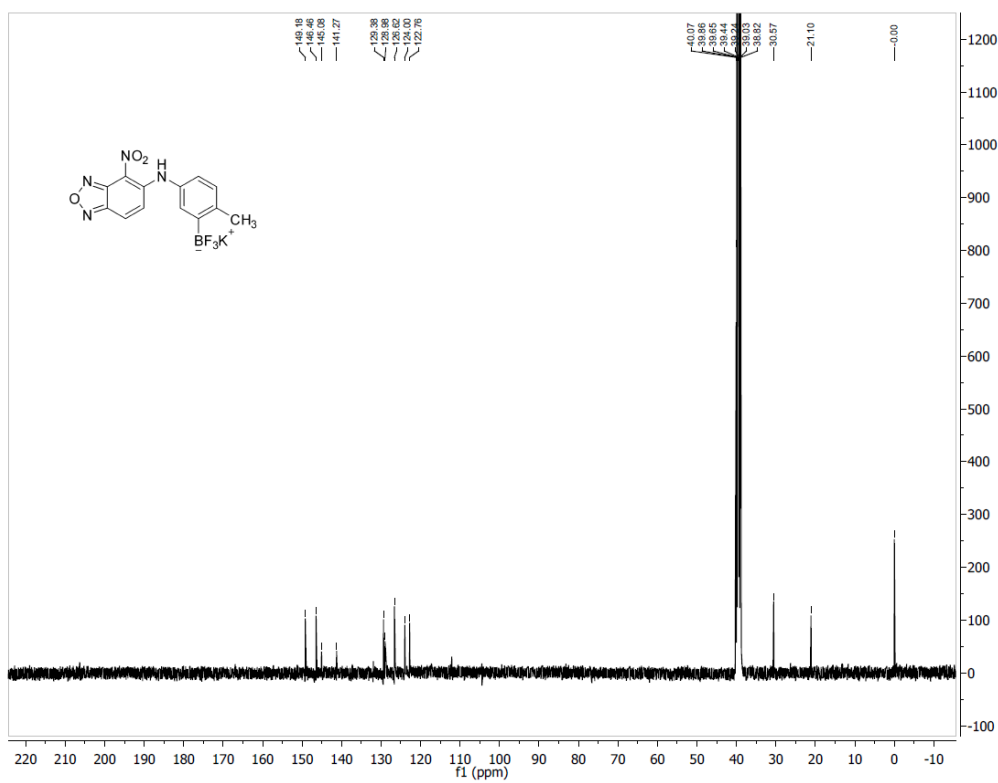

# <sup>13</sup>C NMR of compound (21)

COMPOUND 21

— -138.29

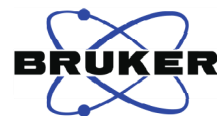

Current Data Parameters  
NAME Oct13-2022  
EXPNO 2  
PROCNO 1

F2 - Acquisition Parameters  
Date\_ 20221013  
Time 15.33 h  
INSTRUM Avance Neo 400 Nanobay  
PROBHD Z163739\_0311 (   
PULPROG zg  
TD 131072  
SOLVENT DMSO  
NS 16  
DS 4  
SWH 90909.094 Hz  
FIDRES 1.387163 Hz  
AQ 0.7208960 sec  
RG 101  
DW 5.500 usec  
DE 6.50 usec  
TE 295.9 K  
D1 1.00000000 sec  
TD0 1  
SFO1 376.4748291 MHz  
NUC1 19F  
P1 12.00 usec  
PLW1 30.18499947 W

F2 - Processing parameters  
ST 65536  
SF 376.5124803 MHz  
WDW EM  
SSR 0  
LB 0.30 Hz  
GB 0  
PC 1.00

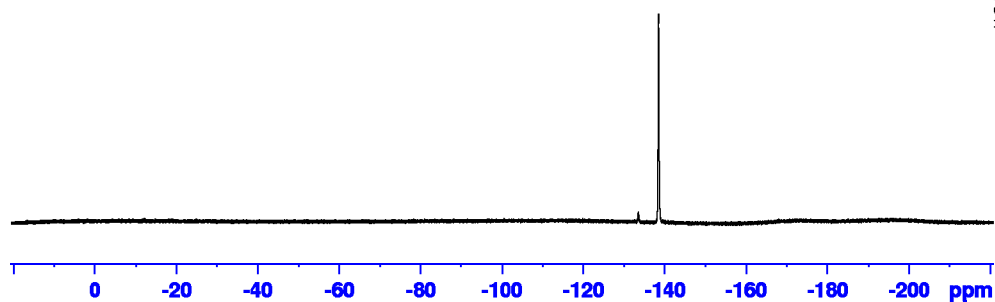

# <sup>19</sup>F NMR of compound (21)

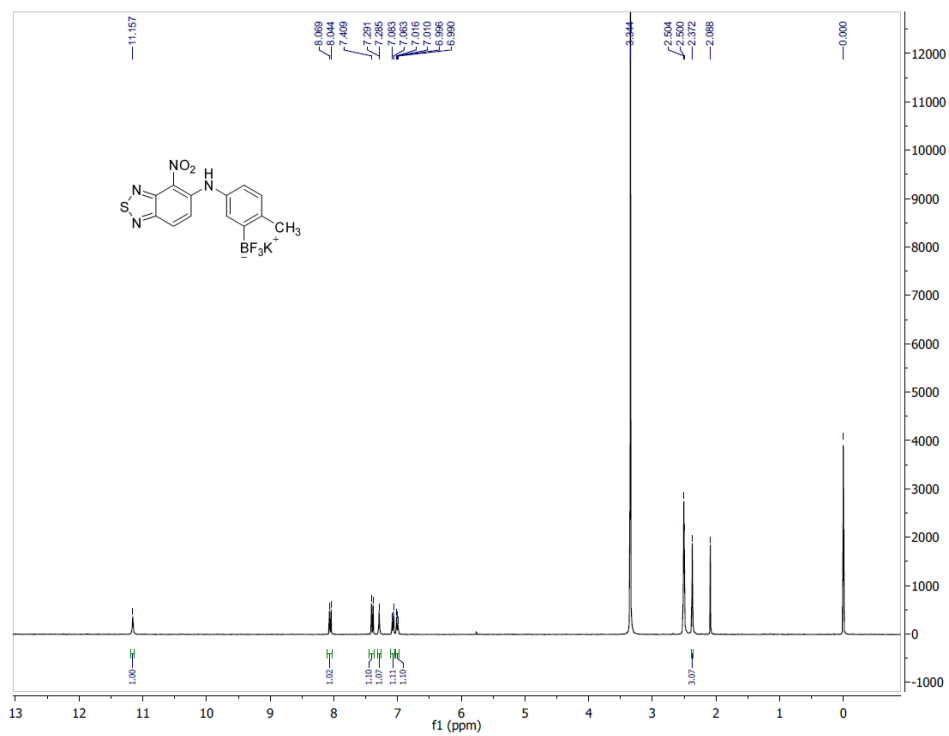

**<sup>1</sup>H NMR of compound (22)**

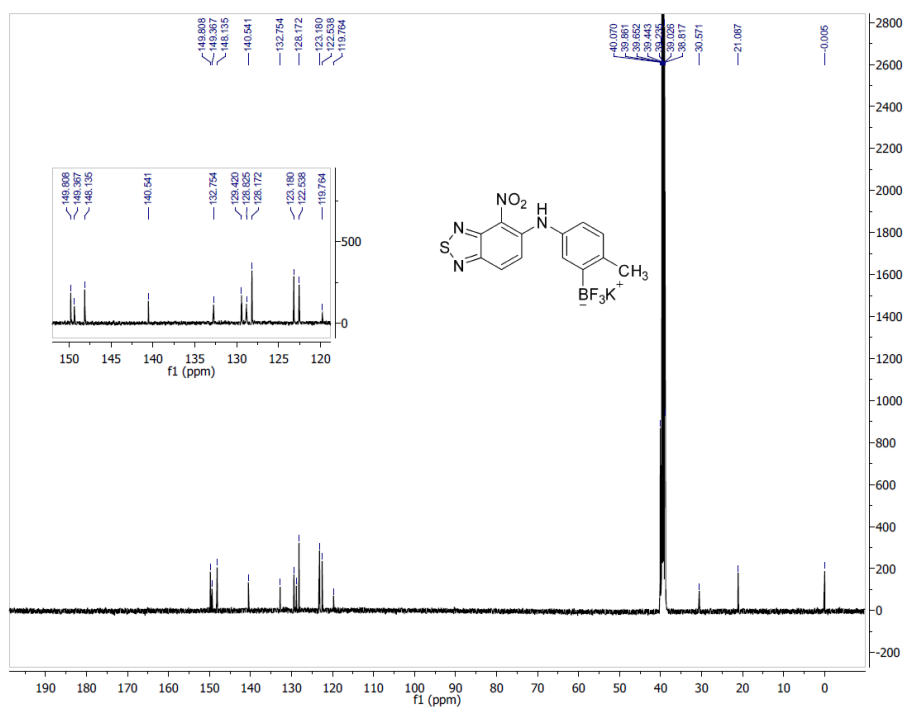

**<sup>13</sup>C NMR of compound (22)**

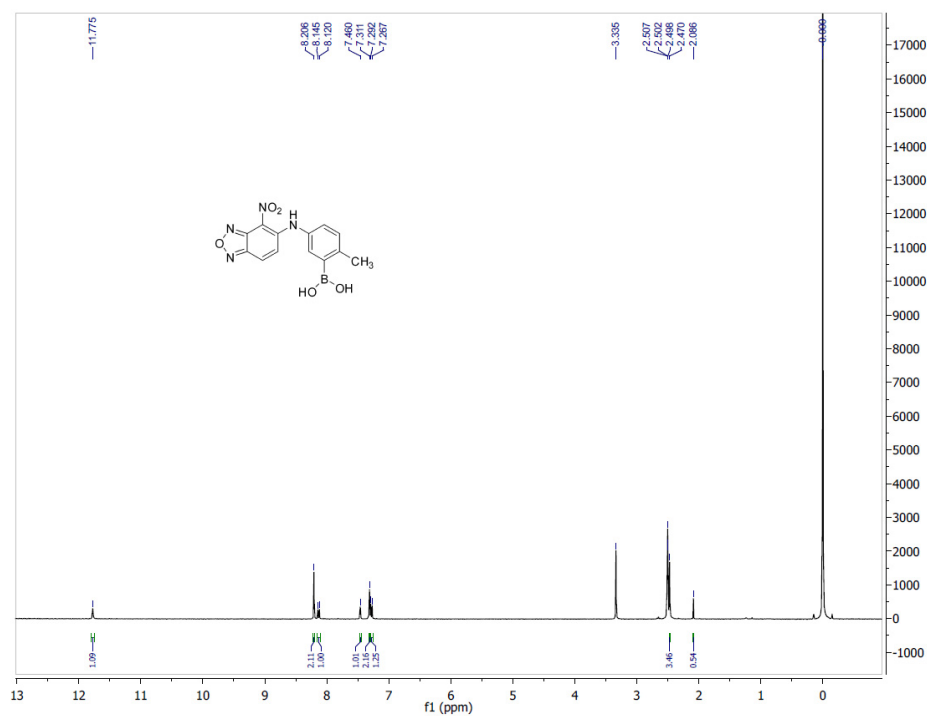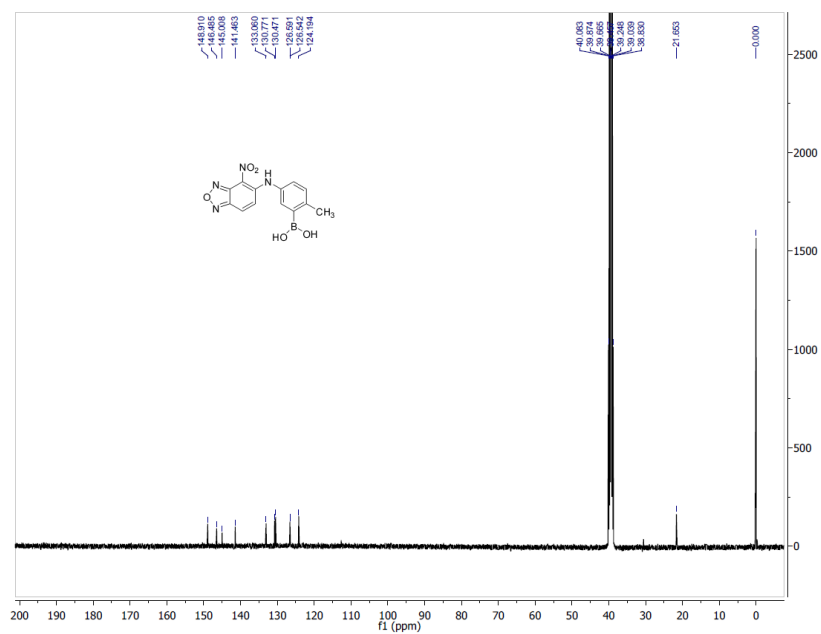

**Figure S1.** Spectra of the products (7–23).
